# Supplementary material for: The 3-D reconstruction of medieval wetland reclamation through electromagnetic induction survey
Source: Springer Nature journal article supplement (doi:10.1038/srep01517), 2013-03-21
Supplement: 41598_2013_BFsrep01517_MOESM1_ESM.pdf [file 41598_2013_BFsrep01517_MOESM1_ESM.pdf]

Supplementary information for

## **The 3-D reconstruction of medieval wetland reclamation through electromagnetic induction survey**

Philippe De Smedt<sup>1\*</sup>, Marc Van Meirvenne<sup>1</sup>, Davy Herremans<sup>2</sup>, Jeroen De Reu<sup>2</sup>,  
Timothy Saey<sup>1</sup>, Eef Meerschman<sup>1</sup>, Philippe Crombé<sup>2</sup>, Wim De Clercq<sup>2</sup>

### **Affiliations**

*1: Department of Soil Management, Faculty of Bioscience Engineering, Ghent University,  
Coupure 653, 9000 Ghent, Belgium*

*2: Department of Archaeology, Faculty of Arts and Philosophy, Ghent University,  
Sint-Pietersnieuwstraat 35, 9000 Ghent, Belgium*

**Supplementary Figure 1:** Excavation trench within S1.....2

**Supplementary Figure 2:** Excavation trench across S2.....3

---

\*Correspondence should be addressed to [Philippe.DeSmedt@UGent.be](mailto:Philippe.DeSmedt@UGent.be).

## Supplementary Figure 1

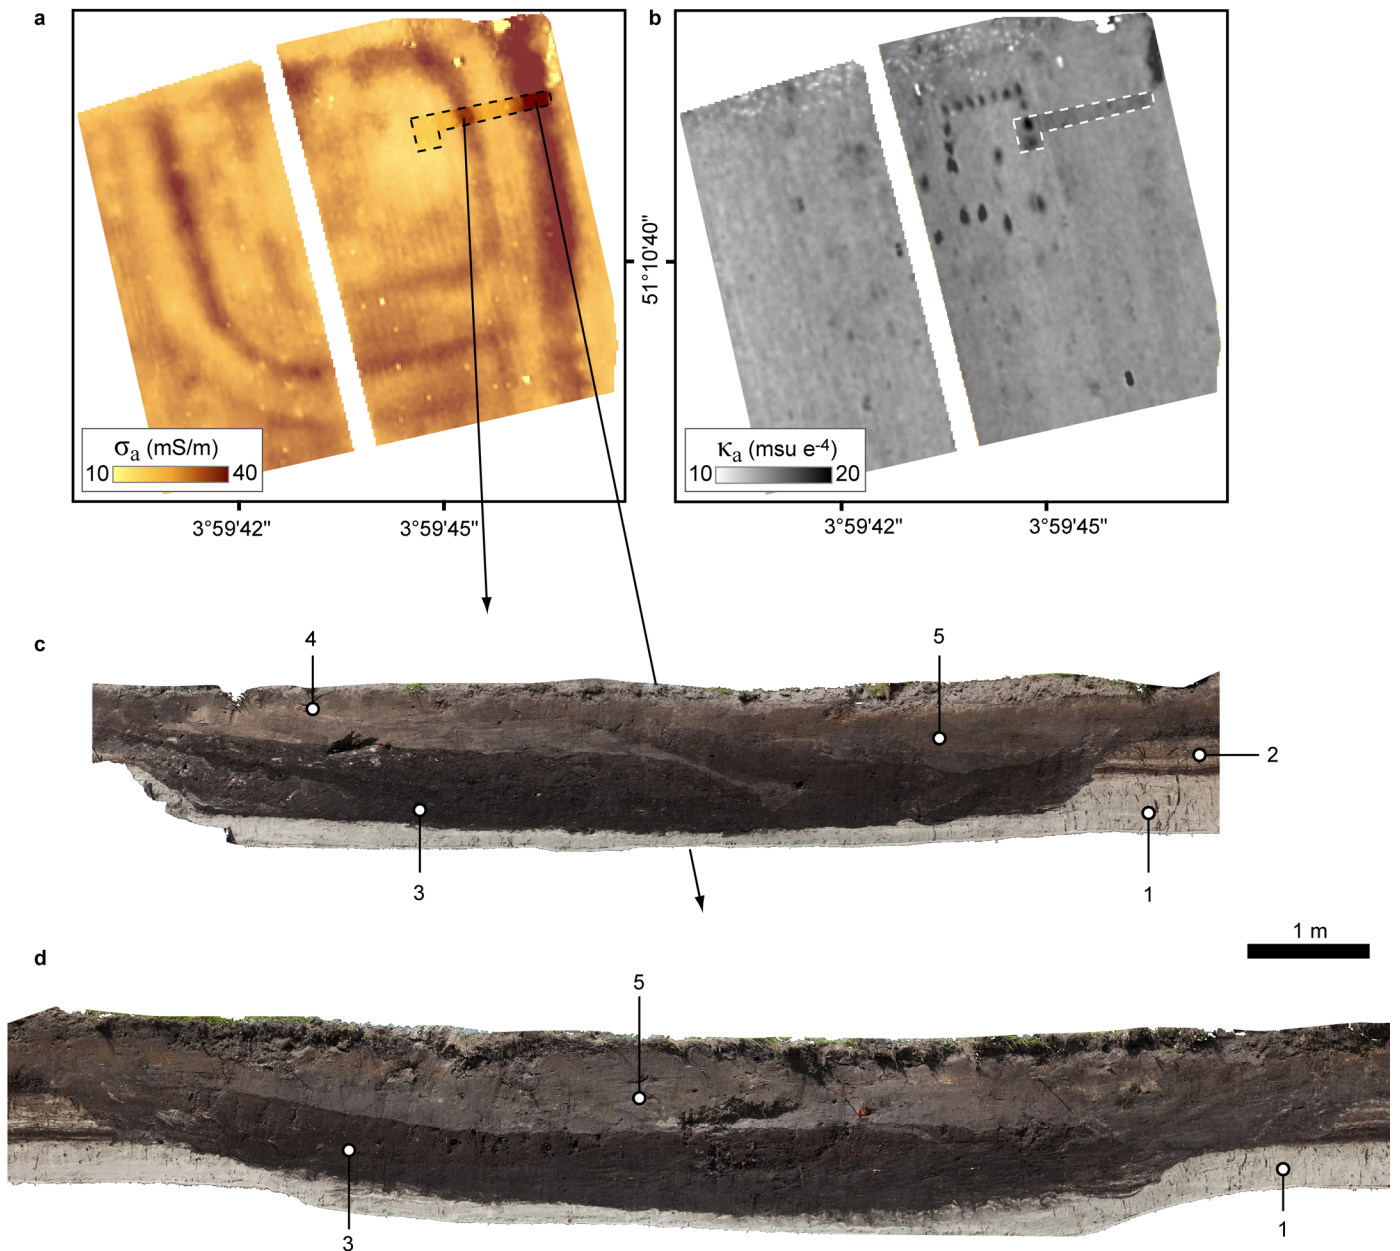

**Supplementary Figure 1: Excavation trench within S1.** a–b, Location plotted on 1 m HCP  $\sigma_a$  data (a) and 2 m HCP  $\kappa_a$  measurements (b), targeting the two moat ditches visible on the  $\sigma_a$  plot and two of the brick block foundations seen in the  $\kappa_a$  measurements. c–d, geometrical profiles of the two sectioned moat ditches showing the pleni-glacial sand substrate (1), palaeolake deposits (2), peat infilling of the bottom of the ditches (3) and sandy (4) and clayey (5) top infilling of the ditches.

## Supplementary Figure 2

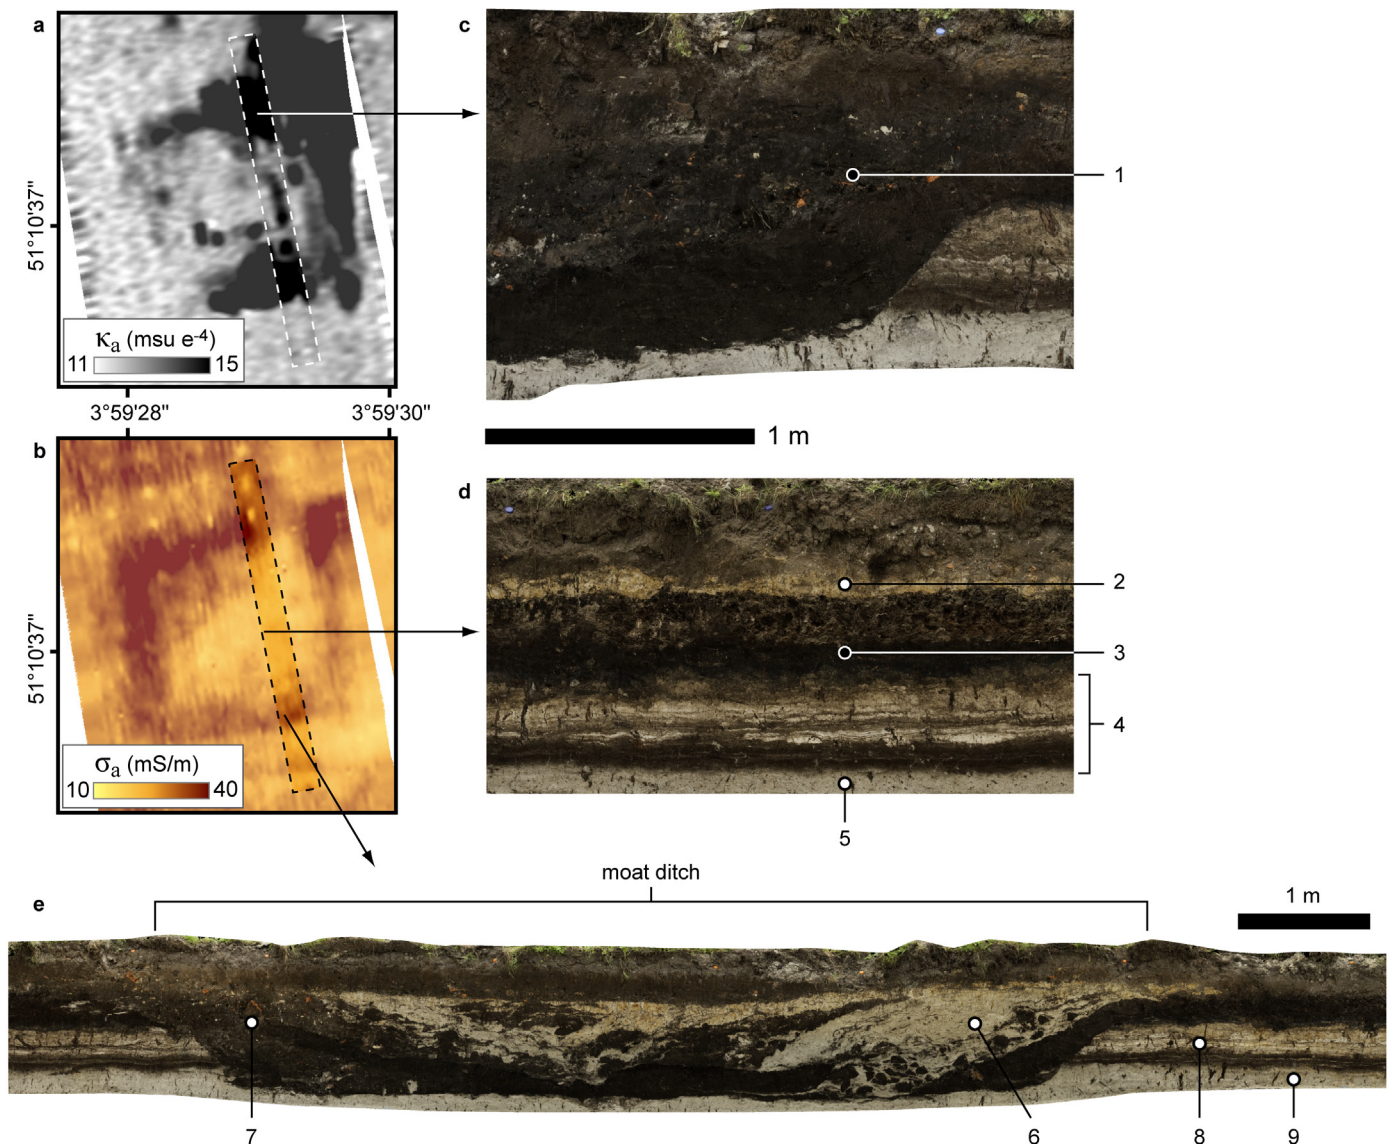

**Supplementary Figure 2: Excavation trench across S2.** **a–b**, Location plotted on 2 m HCP  $\kappa_a$  measurements (**a**) and 1.1 m PRP  $\sigma_a$  data (**b**), targeting the moat ditches on the  $\sigma_a$  plot and the central brick structure and magnetic anomalies in the ditches visible in the  $\kappa_a$  measurements. **c**, Geometrical profile detail showing the magnetic rubble in the moat ditch (1), mainly brick debris and metal slags. **d**, Geometrical profile detail showing traces of the medieval terrain levelling (2) underlying peat (3), palaeolake deposits (4) and pleniglacial sand substrate (5). **e**, Geometrical profile of the southern moat ditch showing traces of the thrown-in moat embankment (6) brick rubble (7), palaeolake deposits (8) and pleniglacial sand substrate (9).
